CORRECTION

# Correction: What you saw is what you will hear: Two new illusions with audiovisual postdictive effects

The *PLOS ONE* Staff

Figs 3 and 4 are incorrect. The orange labels on the bar graphs are incorrectly blurred. The labels should read: Rabbit. The publisher apologizes for the errors. The authors have provided corrected versions here.

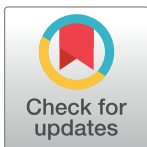

 OPEN ACCESS

**Citation:** The *PLOS ONE* Staff (2018) Correction: What you saw is what you will hear: Two new illusions with audiovisual postdictive effects. *PLoS ONE* 13(11): e0207894. <https://doi.org/10.1371/journal.pone.0207894>

**Published:** November 20, 2018

**Copyright:** © 2018 The PLOS ONE Staff. This is an open access article distributed under the terms of the [Creative Commons Attribution License](https://creativecommons.org/licenses/by/4.0/), which permits unrestricted use, distribution, and reproduction in any medium, provided the original author and source are credited.

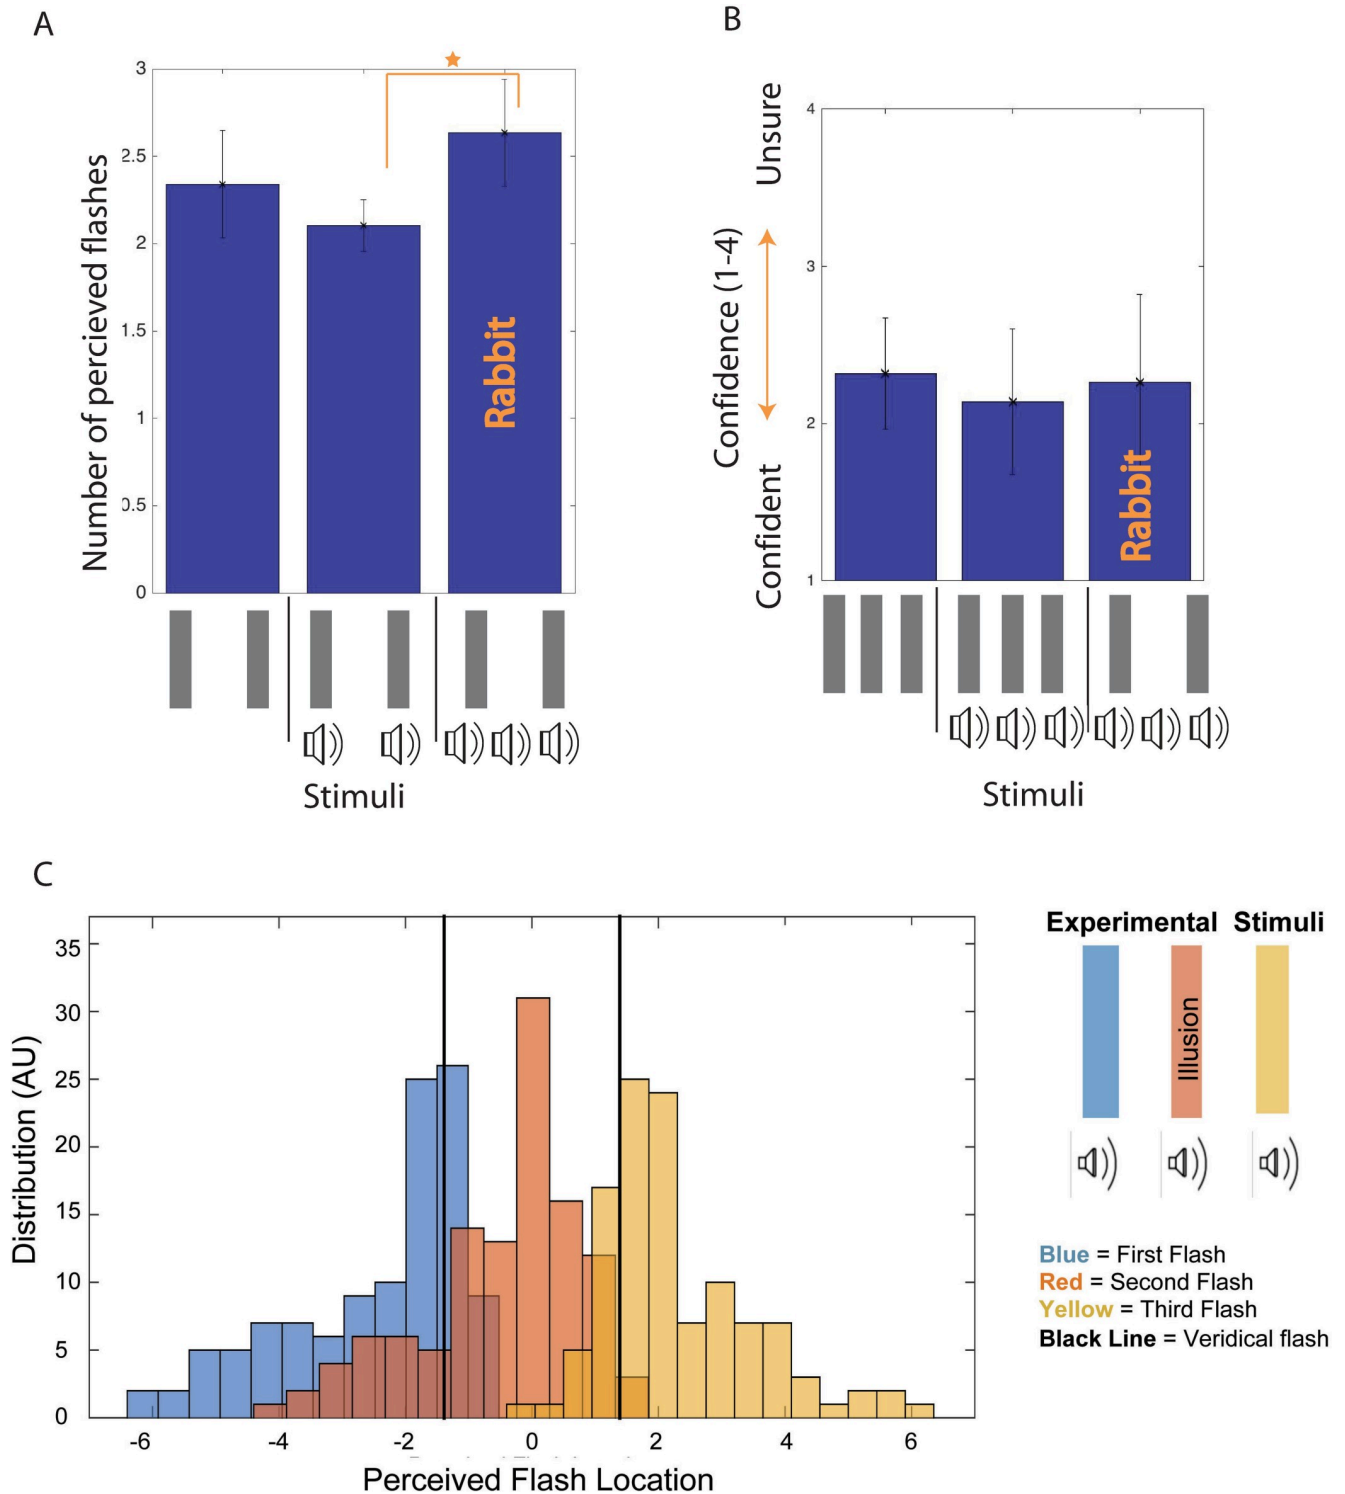

**Fig 3. Illusory AV rabbit results.** Fig 3A plots the number of flashes perceived for several beep and flash stimuli presented in Experiment 1.1. Fig 3B shows the confidence rating reported for perceiving three flashes for the Illusory AV Rabbit stimulus in comparison to non-illusory stimuli. Fig 3C plots the reported flash locations (in centimeters) across participants for the Illusory AV Rabbit stimulus, when three flashes are reported. Error bars are standard deviation.

<https://doi.org/10.1371/journal.pone.0207894.g001>

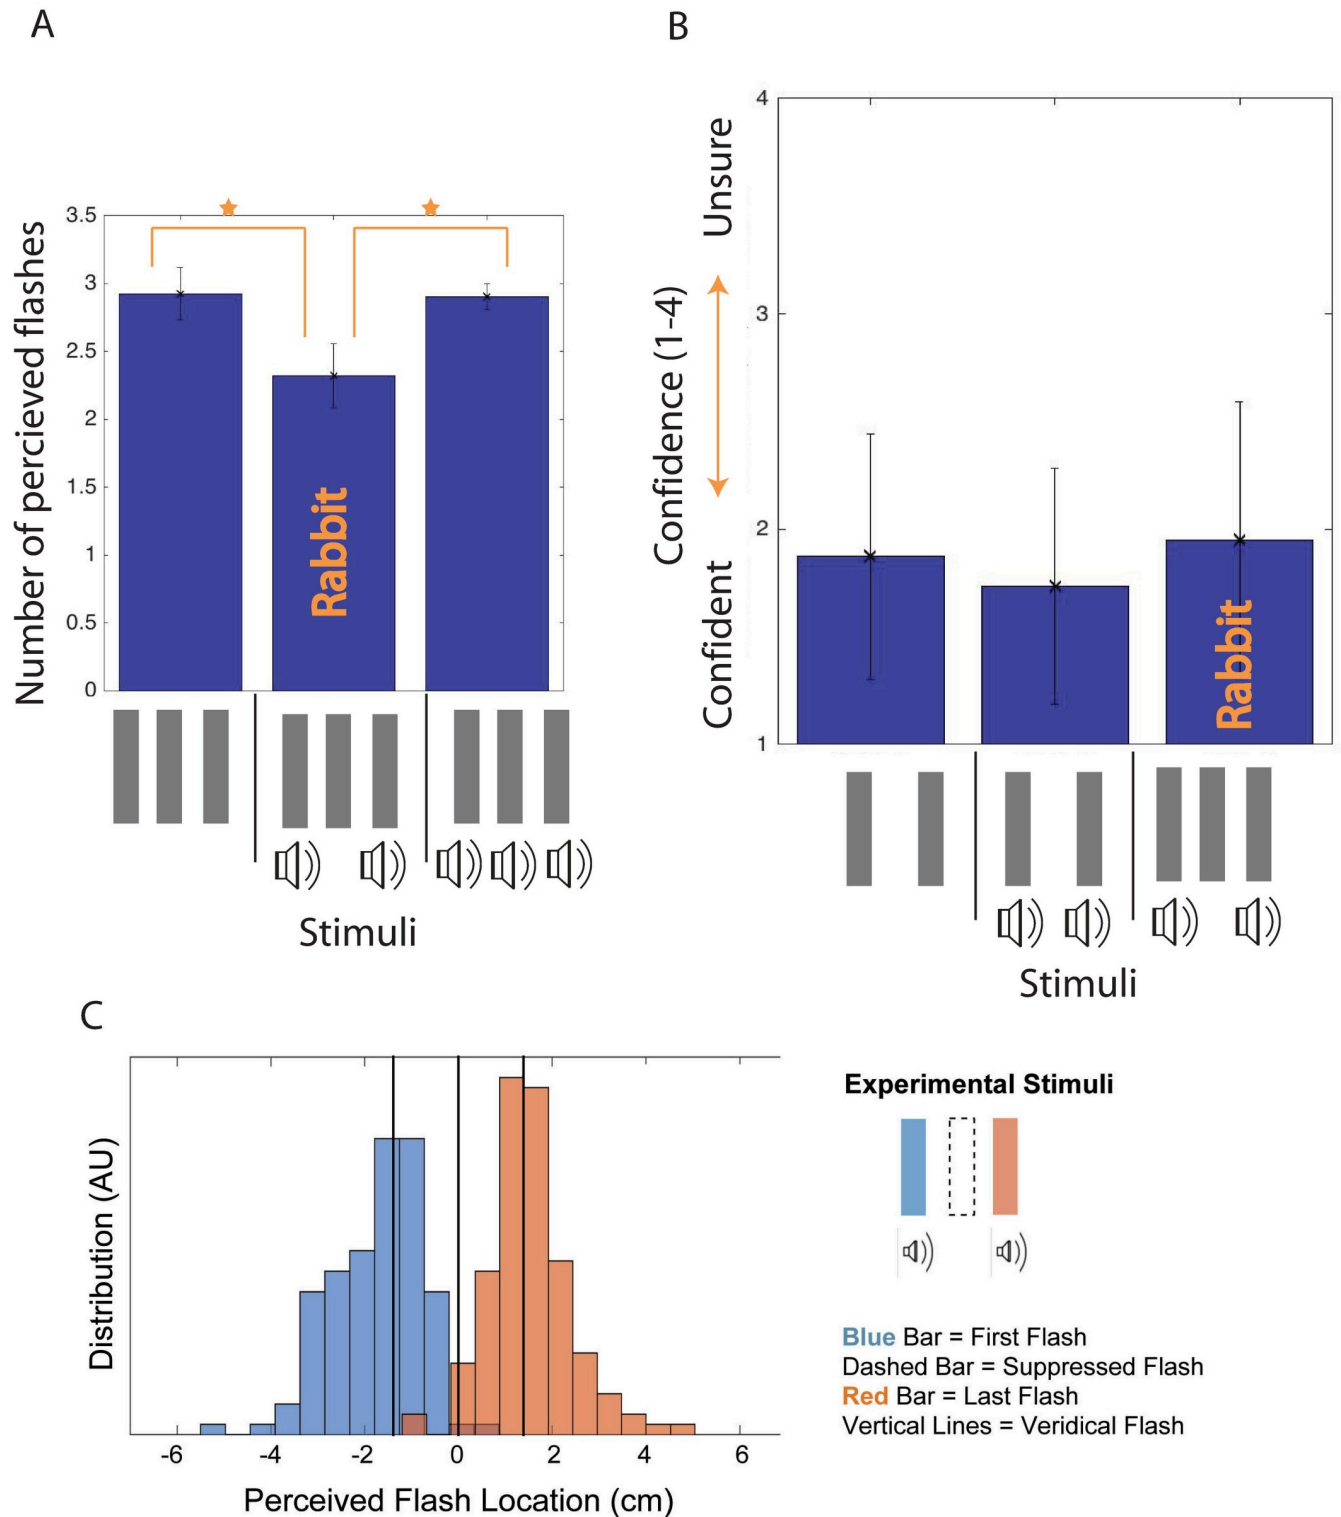

**Fig 4. Invisible AV rabbit results.** Fig 4A plots the number of flashes perceived for several beep and flash stimuli in comparison to the Invisible AV Rabbit stimulus (Experiment 2.1 and 2.2). Fig 4B shows the confidence rating reported for perceiving two flashes for the Invisible AV Rabbit stimulus in comparison to non-illusory stimuli. Fig 4C indicates the reported flash locations (in centimeters) across participants for the Invisible AV Rabbit stimulus, when two flashes are reported. Error bars are standard deviation.

<https://doi.org/10.1371/journal.pone.0207894.g002>

## Reference

1. Stiles NRB, Li M, Levitan CA, Kamitani Y, Shimojo S (2018) What you saw is what you will hear: Two new illusions with audiovisual postdictive effects. PLoS ONE 13(10): e0204217. <https://doi.org/10.1371/journal.pone.0204217> PMID: 30281629
